# Supplementary material
Source: publisher figshare collection journal article supplement (https://tandf.figshare.com/articles/dataset/_/22362378)
Supplement: Supplementary file 1 [file 1]

# NCI-PRO-CTCAE items Danish iblad

| **Status** | Final |
| --- | --- |
| **Client(s) title of questionnaire** | Web: NCI-PRO-CTCAE iblad  Mobile: Symptomer |
| **Indication(s)** | Bladder cancer |
| **Responsible** | Journl |
| **Purpose** | Assessing symptoms and side effects of bladder cancer treatment |
| **Comments** |  |

| **Original questionnaire** |  |
| --- | --- |
| Title | NCI-PRO-CTCAE |
| Attachment | N/A |

**Group 8: Nedsat appetit**

| **#ID** | **Question** | **Answer** | **Type** | **Conditions** | **Feedback** |
| --- | --- | --- | --- | --- | --- |
| 1 | Inden for de seneste 7 dage, hvad var SVÆRHEDSGRADEN af NEDSAT APPETIT da det var VÆRST? | - Ingen - Mild - Moderat - Kraftig - Meget kraftig | Radio buttons | 3 | Forsøg med små måltider og mellemmåltider og spis det, du kan lide.  Drik ikke store mængder væske til maden, da dette kan mindske appetitten.  Vær opmærksom på at spise mad med højt protein- og kalorieindhold, fx sødmælksyoghurt, kakaomælk eller proteindrik. Også letfordøjelig mad anbefales, fx kiks og toast. Undgå mad og drikke med stærk lugt som for eksempel krydret mad og rødvin. |
|  |  |  |  | 4-5 | Kontakt venligst den afdeling, hvor du bliver behandlet i dagtid. Husk at udfylde resten af skemaet, selvom du kontakter afdelingen. |
| 2 | Inden for de seneste 7 dage, hvor meget FORSTYRREDE NEDSAT APPETIT dine sædvanlige eller daglige aktiviteter? | - Slet ikke - Lidt - Noget - En hel del - Rigtig meget | Radio buttons | 3 | Forsøg med små måltider og mellemmåltider og spis det, du kan lide.  Drik ikke store mængder væske til maden, da dette kan mindske appetitten.  Vær opmærksom på at spise mad med højt protein- og kalorieindhold, fx sødmælksyoghurt, kakaomælk eller proteindrik. Også letfordøjelig mad anbefales, fx kiks og toast. Undgå mad og drikke med stærk lugt som for eksempel krydret mad og rødvin. |
|  |  |  |  | 4-5 | Kontakt venligst den afdeling, hvor du bliver behandlet i dagtid. Husk at udfylde resten af skemaet, selvom du kontakter afdelingen. |

**Group 9: Kvalme**

| **#ID** | **Question** | **Answer** | **Type** | **Conditions** | **Feedback** |
| --- | --- | --- | --- | --- | --- |
| 3 | Inden for de seneste 7 dage, hvor OFTE havde du KVALME? | - Aldrig - Sjældent - Af og til - Ofte - Næsten konstant | Radio buttons | 3 | Forsøg at spise flere små måltider selvom du har kvalme, da tom mave kan forværre kvalmen.  Vær opmærksom på at spise mad med højt protein- og kalorieindhold. Også letfordøjelig mad anbefales, fx kiks og toast.  Giver duften af mad kvalme, kan maden evt. tilberedes i ovn eller spises kold.  Drik evt. gerne kulsyreholdige drikke som danskvand og sodavand, da det kan lette på kvalmen at bøvse.  Forsøg med kvalmestillende medicin (f.eks. domperidon), hvis du har fået udleveret dette, og tag det ½ time før hovedmåltiderne. Hvis du er i tvivl, ring da til afdelingen i dagtid. Husk at udfylde resten af skemaet, selvom du kontakter afdelingen. |
|  |  |  |  | 4-5 | Kontakt venligst den afdeling, hvor du bliver behandlet. Husk at udfylde resten af skemaet, selvom du kontakter afdelingen |
| 4 | Inden for de seneste 7 dage, hvad var SVÆRHEDSGRADEN af KVALME da det var VÆRST? | - Ingen - Mild - Moderat - Kraftig - Meget kraftig | Radio buttons | 3 | Forsøg at spise flere små måltider selvom du har kvalme, da tom mave kan forværre kvalmen.  Vær opmærksom på at spise mad med højt protein- og kalorieindhold. Også letfordøjelig mad anbefales, fx kiks og toast.  Giver duften af mad kvalme, kan maden evt. tilberedes i ovn eller spises kold.  Drik evt. gerne kulsyreholdige drikke som danskvand og sodavand, da det kan lette på kvalmen at bøvse.  Forsøg med kvalmestillende medicin (f.eks. domperidon), hvis du har fået udleveret dette, og tag det ½ time før hovedmåltiderne. Hvis du er i tvivl, ring da til afdelingen i dagtid. Husk at udfylde resten af skemaet, selvom du kontakter afdelingen. |
|  |  |  |  | 4-5 | Kontakt venligst den afdeling, hvor du bliver behandlet. Husk at udfylde resten af skemaet, selvom du kontakter afdelingen |

**Group 10: Opkast**

| **#ID** | **Question** | **Answer** | **Type** | **Conditions** | **Feedback** |
| --- | --- | --- | --- | --- | --- |
| 5 | Inden for de seneste 7 dage, hvor OFTE havde du OPKAST? | - Aldrig - Sjældent - Af og til - Ofte - Næsten konstant | Radio buttons | 3 | Drik rigeligt med væske og spis flere små måltider og mellemmåltider, gerne saltholdig mad. Hvil siddende eller tilbagelænet efter et måltid (ikke liggende).  Forsøg med kvalmestillende medicin ved begyndende opkastningstrang, hvis du har fået udleveret dette, (f.eks. domperidon). Hvis du er i tvivl, ring da til afdelingen. Husk at udfylde resten af skemaet, selvom du kontakter afdelingen. |
|  |  |  |  | 4-5 | Kontakt venligst den afdeling, hvor du bliver behandlet. Husk at udfylde resten af skemaet, selvom du kontakter afdelingen |
| 6 | Inden for de seneste 7 dage, hvad var SVÆRHEDSGRADEN af OPKAST da det var VÆRST? | - Ingen - Mild - Moderat - Kraftig - Meget kraftig | Radio buttons | 2 | Ved begyndende opkastningstrang kan du tage det udleverede kvalmestillende medicin (f.eks. domperidon). Hvis du er i tvivl ring da til afdelingen i dagtid, men husk at udfylde resten af skemaet, selvom du kontakter afdelingen. |
|  |  |  |  | 3,4 or 5 | Kontakt venligst den afdeling, hvor du bliver behandlet. Husk at udfylde resten af skemaet, selvom du kontakter afdelingen |

**Group 15: Forstoppelse**

| **#ID** | **Question** | **Answer** | **Type** | **Conditions** | **Feedback** |
| --- | --- | --- | --- | --- | --- |
| 7 | Inden for de seneste 7 dage, hvad var SVÆRHEDSGRADEN af FORSTOPPELSE da det var VÆRST? | - Ingen - Mild - Moderat - Kraftig - Meget kraftig | Radio buttons | 2 | Drik rigeligt med væske og spis fiberholdig kost, fx grøntsager, rugbrød, gryn eller groft knækbrød  Sørg for at være fysisk aktiv (gang, løb eller svømning). Det stimulerer din tarms naturlige bevægelser.  Gå på toilettet, når du føler afføringstrang, hold ikke igen.  Noget af den medicin, du tager, kan give forstoppelse. Tal evt. med din behandlende læge om dette. |
|  |  |  |  | 3 | Forsøg evt. med afføringsmidler som fx movicol. Tal med din læge, hvis du påbegynder dette |
|  |  |  |  | 4 or 5 | Kontakt venligst den afdeling, hvor du bliver behandlet. Husk at udfylde resten af skemaet, selvom du kontakter afdelingen |

**Group 16: Tynd eller vandig afføring (diarré)**

| **#ID** | **Question** | **Answer** | **Type** | **Conditions** | **Feedback** |
| --- | --- | --- | --- | --- | --- |
| 8 | Inden for de seneste 7 dage, hvor OFTE havde du TYND ELLER VANDIG AFFØRING (DIARRE)? | - Aldrig - Sjældent - Af og til - Ofte - Næsten konstant | Radio buttons | 3 | Husk at drikke rigeligt med væske, men drik helst ikke til maden, da væske kan mindske appetitten. Spis små hyppige måltider og saltholdig mad, fx kiks. Spis gerne bananer, ris og hvidt brød. Undgå rå grøntsager, meget fed mad og brød med kerner.  Ved diarré kan du tage stoppende medicin (Imolope/ Loperamid), det kan eventuelt kombineres med HUSK. Hvis du ikke har fået udleveret Imolope, kan dette købes i håndkøb.  Du kan både tage Imolope fast eller efter behov, hvis du føler begyndende diarré. Ved brug af Imolope skal du tage 2 tabletter første gang og ved fortsat diarré efter 1 time tages endnu en tablet. Dette kan du fortsætte med til du maximalt har taget 8 tabletter pr. døgn. Har fået andet at vide af din læge, skal du følge dette. Hvis du har gjort det uden effekt, skal du ringe til afdelingen. Husk at udfylde resten af skemaet, selvom du kontakter afdelingen. |
|  |  |  |  | 4 or 5 | Kontakt venligst den afdeling, hvor du bliver behandlet. Husk at udfylde resten af skemaet, selvom du kontakter afdelingen |
|  | Inden for de seneste 7 dage, hvor meget FORSTYRREDE TYND ELLER VANDIG AFFØRING (DIARRE) dine sædvanlige eller daglige aktiviteter? | 1. Slet ikke 2. Lidt 3. Noget 4. En hel del 5. Rigtig meget | Radio buttons |  | Husk at drikke rigeligt med væske, men drik helst ikke til maden, da væske kan mindske appetitten. Spis små hyppige måltider og saltholdig mad, fx kiks. Spis gerne bananer, ris og hvidt brød. Undgå rå grøntsager, meget fed mad og brød med kerner.  Ved diarré kan du tage stoppende medicin (Imolope/Loperamid), det kan eventuelt kombineres med HUSK. Hvis du ikke har fået udleveret Imolope/Loperamid, kan dette købes i håndkøb.  Du kan både tage Imolope fast eller efter behov, hvis du føler begyndende diarré. Ved brug af Imolope skal du tage 2 tabletter første gang og ved fortsat diarré efter 1 time tages endnu en tablet. Dette kan du fortsætte med til du maximalt har taget 8 tabletter pr. døgn. Har fået andet at vide af din læge, skal du følge dette. Hvis du har gjort det uden effekt, skal du ringe til afdelingen. Husk at udfylde resten af skemaet, selvom du kontakter afdelingen. |
|  |  |  |  | 4 or 5 | Kontakt venligst den afdeling, hvor du bliver behandlet. Husk at udfylde resten af skemaet, selvom du kontakter afdelingen |

**Group 19: Åndenød**

| **#ID** | **Question** | **Answer** | **Type** | **Conditions** | **Feedback** |
| --- | --- | --- | --- | --- | --- |
| 9 | Inden for de seneste 7 dage, hvad var SVÆRHEDSGRADEN af ÅNDENØD da det var VÆRST? | - Ingen - Mild - Moderat - Kraftig - Meget kraftig | Radio buttons | 2 | Lav evt. vejrtækningsøvelser (dybe vejrtækninger og pustelyde)  Det kan også hjælpe at få kontrol over den angst og panik, der kan opstå, når du har åndenød. Prøv evt. at trække vejret med mellemgulvet. Det kan også hjælpe at åbne et vindue eller gå ud i den friske luft. At lytte til musik kan måske også hjælpe og aflede følelsen af åndenød. |

**Group 22: Hævede arme eller ben**

| **#ID** | **Question** | **Answer** | **Type** | **Conditions** | **Feedback** |
| --- | --- | --- | --- | --- | --- |
| 11 | Inden for de seneste 7 dage, hvor OFTE havde du HÆVEDE ARME ELLER BEN? | - Aldrig - Sjældent - Af og til - Ofte - Næsten konstant | Radio buttons | 3 | Undgå højt saltindhold i maden  Sørg for at være fysisk aktiv og lave evt. venepumpeøvelser  Du kan også prøve at lejre armen eller benet højt, fx under søvn |
|  |  |  |  | 4 or 5 | Hvis det opstået akut bedes du kontakte afdelingen med det samme. Husk at udfylde resten af skemaet, selvom du kontakter afdelingen |
| 12 | Inden for de seneste 7 dage, hvad var SVÆRHEDSGRADEN af HÆVEDE ARME ELLER BEN da det var VÆRST? | - Ingen - Mild - Moderat - Kraftig - Meget kraftig | Radio buttons | 2 | Undgå højt saltindhold i maden  Sørg for at være fysisk aktiv og lave evt. venepumpeøvelser  Du kan også prøve at lejre armen eller benet højt, fx under søvn. |
|  |  |  |  | 3, 4 or 5 | Hvis det opstået akut bedes du kontakte afdelingen med det samme. Husk at udfylde resten af skemaet, selvom du kontakter afdelingen |
| 13 | Inden for de seneste 7 dage, hvor meget FOSTYRREDE HÆVEDE ARME ELLER BEN dine sædvanlige eller daglige aktiviteter? | - Slet ikke - Lidt - Noget - En hel del - Rigtig meget | Radio buttons | 2 | Undgå højt saltindhold i maden  Sørg for at være fysisk aktiv og lave evt. venepumpeøvelser  Du kan også prøve at lejre armen eller benet højt, fx under søvn |
|  |  |  |  | 3,4 og 5 | Hvis det opstået akut bedes du kontakte afdelingen med det samme. Husk at udfylde resten af skemaet, selvom du kontakter afdelingen. |

**Group 23: Hamrende eller galoperende hjerteslag (Hjertebanken)**

| **#ID** | **Question** | **Answer** | **Type** | **Conditions** | **Feedback** |
| --- | --- | --- | --- | --- | --- |
| 14 | Inden for de seneste 7 dage, hvor OFTE FØLTE DU HAMRENDE ELLER GALOPERENDE HJERTESLAG (HJERTEBANKEN)? | - Aldrig - Sjældent - Af og til - Ofte - Næsten konstant | Radio buttons | 3 | Undgå at drikke for meget alkohol eller koffeinholdige drikke som kaffe, sort te, cola og kakao. Drik i stedet urtete, mælk og saft. Det er også vigtigt at du ikke er dehydreret.  Hvis du ryger, kan du overveje rygestop, da rygning kan få pulsen til at stige.  Undgå stress og sørg for at der er plads til søvn, hvile og daglig motion  Hvis det bliver værre kontakt venligst afdelingen. Husk at udfylde resten af skemaet, selvom du kontakter afdelingen. |
|  |  |  |  | 4 or 5 | Kontakt venligst den afdeling, hvor du bliver behandlet uanset tidspunkt. Husk at udfylde resten af skemaet, selvom du kontakter afdelingen |
| 15 | Inden for de seneste 7 dage, hvad var SVÆRHEDSGRADEN af HAMRENDE ELLER GALOPERENDE HJERTESLAG (HJERTEBANKEN) da det var VÆRST? | - Ingen - Mild - Moderat - Kraftig - Meget kraftig | Radio buttons | 3 | Undgå at drikke for meget alkohol eller koffeinholdige drikke som kaffe, sort te, cola og kakao. Drik i stedet urtete, mælk og saft. Det er også vigtigt at du ikke er dehydreret.  Hvis du ryger, kan du overveje rygestop, da rygning kan få pulsen til at stige.  Undgå stress og sørg for at der er plads til søvn, hvile og daglig motion  Hvis det bliver værre kontakt venligst afdelingen. Husk at udfylde resten af skemaet, selvom du kontakter afdelingen |
|  |  |  |  | 4 or 5 | Kontakt venligst den afdeling, hvor du bliver behandlet med det samme. Husk at udfylde resten af skemaet, selvom du kontakter afdelingen |

**Group 28: Kløende hud**

| **#ID** | **Question** | **Answer** | **Type** |  | **Conditions** |
| --- | --- | --- | --- | --- | --- |
| 16 | Inden for de seneste 7 dage, hvad var SVÆRHEDSGRADEN af KLØENDE HUD da det var VÆRST? | - Ingen - Mild - Moderat - Kraftig - Meget kraftig | Radio buttons | 3 | Prøv at smøre dig med fed creme uden parfume, da tør hud forværrer kløen. Forsøg evt. også med kosttilskuddet ”Livets Olie”, som kan lindre tør hud og ledsagende kløe.  Anvend evt. skælshampoo til at lindre kløe i hårbunden.  Har du medicin mod allergi/høfeber (fx cetirizin) kan du prøve at tage det |
|  |  |  |  | 4 or 5 | Kontakt venligst den afdeling, hvor du bliver behandlet i dagtid. Husk at udfylde resten af skemaet, selvom du kontakter afdelingen |

**Group 48: Smerter**

| **#ID** | **Question** | **Answer** | **Type** | **Conditions** | **Feedback** |
| --- | --- | --- | --- | --- | --- |
| 17 | Inden for de seneste 7 dage, hvor OFTE havde du SMERTER? | - Aldrig - Sjældent - Af og til - Ofte - Næsten konstant | Radio buttons | 3 | Hvis du har smertestillende medicin i hjemmet og er blevet instrueret i, hvordan det skal tages, kan du tage dette ved behov. Er du i tvivl om, hvordan medicinen skal tages, ring da til afdelingen i dagtid. Husk at udfylde resten af skemaet, selvom du kontakter afdelingen. |
|  |  |  |  | 4 or 5 | Kontakt venligst afdelingen. Husk at udfylde resten af skemaet, selvom du kontakter afdelingen |
| 18 | Inden for de seneste 7 dage, hvad var SVÆRHEDSGRADEN af SMERTERNE da det var VÆRST? | - Ingen - Mild - Moderat - Kraftig - Meget kraftig | Radio buttons | 2 | Hvis du har smertestillende medicin i hjemmet og er blevet instrueret i, hvordan det skal tages, kan du tage dette ved behov. Er du i tvivl om, hvordan medicinen skal tages, ring da til afdelingen. Husk at udfylde resten af skemaet, selvom du kontakter afdelingen. |
|  |  |  |  | 3, 4 or 5 |  |
| 19 | Inden for de seneste 7 dage, hvor meget FOSTYRREDE SMERTERNE dine sædvanlige eller daglige aktiviteter? | - Slet ikke - Lidt - Noget - En hel del - Rigtig meget | Radio buttons | 3 | Hvis du har smertestillende medicin i hjemmet og er blevet instrueret i, hvordan det skal tages, kan du tage dette ved behov. Er du i tvivl om, hvordan medicinen skal tages, ring da til afdelingen. Husk at udfylde resten af skemaet, selvom du kontakter afdelingen |
|  |  |  |  | 4 or 5 | Kontakt venligst afdelingen. Husk at udfylde resten af skemaet, selvom du kontakter afdelingen |

**Group 52: Søvnbesvær (herunder besvær med at falde i søvn, sove igennem eller vågne tidligt)?**

| **#ID** | **Question** | **Answer** | **Type** | **Conditions** | **Feedback** |
| --- | --- | --- | --- | --- | --- |
| 20 | Inden for de seneste 7 dage, hvad var SVÆRHEDSGRADEN af SØVNBESVÆR(HERUNDER BESVÆR MED AT FALDE I SØVN, SOVE IGENNEM ELLER VÅGNE TIDLIGT) da det var VÆRST? | - Ingen - Mild - Moderat - Kraftig - Meget kraftig | Radio buttons | 3 | Sørg for at gå i seng og stå op på samme tidspunkt hver dag.  Undgå at drikke te, kaffe, alkohol og rygning før sengetid  Der skal være frisk luft og køligt i soveværelse.  Det er også en god ide at undgå skærme som mobiltelefon eller computer lige før sengetid. Hvis du vågner om natten, så undlad at tænde lys og kigge på skærme. Undgå i det hele taget lys og lyde i soveværelset.  Ved tankemylder/spekulationer, kan det give ro at skrive tankerne ned.  Motion kan også anbefales, dog ikke lige før sengetid.  Anvend evt. afspændingsteknikker |
|  |  |  |  | 4 or 5 | Kontakt venligst den afdeling, hvor du bliver behandlet i dagtid. Husk at udfylde resten af skemaet, selvom du kontakter afdelingen. |
| 21 | Inden for de seneste 7 dage, hvor meget FOSTYRREDE SØVNBESVÆRET(HERUNDER BESVÆR MED AT FALDE I SØVN, SOVE IGENNEM ELLER VÅGNE TIDLIGT) dine sædvanlige eller daglige aktiviteter? | - Slet ikke - Lidt - Noget - En hel del - Rigtig meget | Radio buttons | 3 | Sørg for at gå i seng og stå op på samme tidspunkt hver dag.  Undgå at drikke te, kaffe, alkohol og rygning før sengetid  Der skal være frisk luft og køligt i soveværelse.  Det er også en god ide at undgå skærme som mobiltelefon eller computer lige før sengetid. Hvis du vågner om natten, så undlad at tænde lys og kigge på skærme. Undgå i det hele taget lys og lyde i soveværelset.  Ved tankemylder/spekulationer, kan det give ro at skrive tankerne ned.  Motion kan også anbefales, dog ikke lige før sengetid.  Anvend evt. afspændingsteknikker |
|  |  |  |  | 4 or 5 | Kontakt venligst den afdeling, hvor du bliver behandlet i dagtid. Husk at udfylde resten af skemaet, selvom du kontakter afdelingen. |

|  |
| --- |

**Group 53: Udmattelse, træthed eller manglende energi**

| **#ID** | **Question** | **Answer** | **Type** | **Conditions** | **Feedback** |
| --- | --- | --- | --- | --- | --- |
| 22 | Inden for de seneste 7 dage, hvad var SVÆRHEDSGRADEN af UDMATTELSE, TRÆTHED ELLER MANGLENDE ENERGI da det var VÆRST? | - Ingen - Mild - Moderat - Kraftig - Meget kraftig | Radio buttons | 3 | Tilrettelæg din dag efter dit energiniveau, så de mest krævende aktiviteter lægges, når du har mest energi.  Tag korte hvil i løbet af dagen, men vær også jævnligt fysisk aktiv med gåture, løb eller fitness. Selvom du ikke føler du orker det, kan det faktisk give mere energi.  Sørg for at drikke tilstrækkeligt med væske i løbet af dagen, så du har vandladning hver 4. time.  Hvis du oplever symptomer ikke bedres over 3-4 dage, kontakt da afdelingen mhp yderligere råd. |
|  |  |  |  | 4 or 5 | Kontakt venligst den afdeling, hvor du bliver behandlet i dagtid. Husk at udfylde resten af skemaet, selvom du kontakter afdelingen. |
| 23 | Inden for de seneste 7 dage, hvor meget FOSTYRREDE UDMATTELSEN, TRÆTHEDEN ELLER DEN MANGLENDE ENERGI  dine sædvanelige eller daglige aktiviteter? | - Slet ikke - Lidt - Noget - En hel del - Rigtig meget | Radio buttons | 3 | Tilrettelæg din dag efter dit energiniveau, så de mest krævende aktiviteter lægges, når du har mest energi.  Tag korte hvil i løbet af dagen, men vær også jævnligt fysisk aktiv med gåture, løb eller fitness. Selvom du ikke føler du orker det, kan det faktisk give mere energi.  Sørg for at drikke tilstrækkeligt med væske i løbet af dagen, så du har vandladning hver 4. time.  Hvis du oplever symptomer ikke bedres over 3-4 dage, kontakt da afdelingen mhp yderligere råd. |
|  |  |  |  | 4 or 5 | Kontakt venligst den afdeling, hvor du bliver behandlet i dagtid. Husk at udfylde resten af skemaet, selvom du kontakter afdelingen. |

**Group 54: Angst**

| **#ID** | **Question** | **Answer** | **Type** | **Conditions** | **Feedback** |
| --- | --- | --- | --- | --- | --- |
| 24 | Inden for de seneste 7 dage, hvor OFTE FØLTE DU ANGST? | - Aldrig - Sjældent - Af og til - Ofte - Næsten konstant | Radio buttons | 3 | Overvej om du har brug for hjælp fra familie og venner. At dele sine tanker med andre kan måske nedsætte angst og følelsen af ensomhed.  Vær sammen med de mennesker, du holder af.  Prøv med fysisk træning for at aflede tankerne.  Lav evt. afspændingsøvelser, meditation eller mindfulness. |
|  |  |  |  | 4 or 5 | Kontakt venligst afdelingen. Husk at udfylde resten af skemaet, selvom du kontakter afdelingen |
| 25 | Inden for de seneste 7 dage, hvad var SVÆRHEDSGRADEN af ANGST da det var VÆRST? | - Ingen - Mild - Moderat - Kraftig - Meget kraftig | Radio buttons | 2 | Overvej om du har brug for hjælp fra familie og venner. At dele sine tanker med andre kan måske nedsætte angst og følelsen af ensomhed.  Vær sammen med de mennesker, du holder af.  Prøv med fysisk træning for at aflede tankerne.  Lav evt. afspændingsøvelser, meditation eller mindfulness. |
|  |  |  |  | 3, 4 or 5 | Kontakt venligst afdelingen. Husk at udfylde resten af skemaet, selvom du kontakter afdelingen. |
| 26 | Inden for de seneste 7 dage, hvor meget FOSTYRREDE ANGSTEN dine sædvanlige eller daglige aktiviteter? | - Slet ikke - Lidt - Noget - En hel del - Rigtig meget | Radio buttons | 3 | Overvej om du har brug for hjælp fra familie og venner. At dele sine tanker med andre kan måske nedsætte angst og følelsen af ensomhed.  Vær sammen med de mennesker, du holder af.  Prøv med fysisk træning for at aflede tankerne.  Lav evt. afspændingsøvelser, meditation eller mindfulness. |
|  |  |  |  | 4 or 5 | Kontakt venligst afdelingen. Husk at udfylde resten af skemaet, selvom du kontakter afdelingen |

**Group 63: Hyppig vandladning**

| **#ID** | **Queion** | **Answer** | **Type** | **Conditions** | **Feedback** |
| --- | --- | --- | --- | --- | --- |
| 27 | Inden for de seneste 7 dage, var der tidspunkter hvor du HYPPIGT SKULLE LADE VANDET? | - Aldrig - Sjældent - Af og til - Ofte - Næsten konstant | Radio buttons | 3 | Giv dig god tid til vandladningen, så du får tømt din blære ordentligt. Brug ikke mavemusklerne til at presse urinen ud. Sid afslappet på toilettet med godt fodfæste. Brug evt. en skammel.  Forsøg evt. med dobbelt vandladning, hvor du lader vandet 2 gange med højst 5 minutters mellemrum. Dette gøres 2-3 gange dagligt. Du vil ofte kunne få lidt mere ud anden gang. Du må gerne forlade badeværelset mellem vandladningerne. Det er især vigtigt at praktisere dobbelt vandladning om morgenen samt ved sengetid.  Undgå at indtage for meget væske efter kl. ca. 18, hvis du har problemer med at skulle op om natten  Forsøg evt. med at nedsætte dit forbrug af kaffe, te, cola og lign, da koffeinholdige drikke har en vanddrivende effekt.  Lav evt. bækkenbundøvelser. Du kan mindske hyppig vandladningstrang ved at styrke dine bækkenbundsmuskler. |
|  |  |  | 4 or 5 | Kontakt venligst afdelingen. Husk at udfylde resten af skemaet, selvom du kontakter afdelingen |
| 28 | Inden for de seneste 7 dage, hvor meget FOSTYRREDE den HYPPIGE VANDLADNING dine sædvanlige eller daglige aktiviteter? | - Slet ikke - Lidt - Noget - En hel del - Rigtig meget | Radio buttons | 3 | Giv dig god tid til vandladningen, så du får tømt din blære ordentligt. Brug ikke mavemusklerne til at presse urinen ud. Sid afslappet på toilettet med godt fodfæste. Brug evt. en skammel.  Forsøg evt. med dobbelt vandladning, hvor du lader vandet 2 gange med højst 5 minutters mellemrum. Dette gøres 2-3 gange dagligt. Du vil ofte kunne få lidt mere ud anden gang. Du må gerne forlade badeværelset mellem vandladningerne. Det er især vigtigt at praktisere dobbelt vandladning om morgenen samt ved sengetid.  Undgå at indtage for meget væske efter kl. ca. 18, hvis du har problemer med at skulle op om natten  Forsøg evt. med at nedsætte dit forbrug af kaffe, te, cola og lign, da koffeinholdige drikke har en vanddrivende effekt.  Lav evt. bækkenbundøvelser. Du kan mindske hyppig vandladningstrang ved at styrke dine bækkenbundsmuskler. |

**Group 74: Kuldegysninger eller kulderystelser**

| **#ID** | **Question** | **Answer** | **Type** | **Conditions** | **Conditions** |
| --- | --- | --- | --- | --- | --- |
| 29 | Inden for de seneste 7 dage, hvor OFTE havde du KULDEGYSNINGER ELLER KULDERYSTELSER? | - Aldrig - Sjældent - Af og til - Ofte - Næsten konstant | Radio buttons | 2 or 3 | Hvis du oplever kulderystelser bør du tjekke din temperatur og kontakte afdelingen ved en temperatur på 38,0 eller derover ved flere på hinanden gentagne målinger. Hvis din temperatur er på mere end 38.5 blot en enkelt gang, skal du også kontakte afdelingen uanset tidspunkt. |
|  |  |  |  | 4 or 5 | Kontakt venligst afdelingen. Husk at udfylde resten af skemaet, selvom du kontakter afdelingen. |
| 30 | Inden for de seneste 7 dage, hvad var SVÆRHEDSGRADEN af KULDEGYSNINGERNE ELLER KULDERYSTELSERNE da det var VÆRST? | - Ingen - Mild - Moderat - Kraftig - Meget kraftig | Radio buttons | 2 | Hvis du oplever kulderystelser bør du tjekke din temperatur og kontakte afdelingen ved en temperatur på 38,0 eller derover ved flere på hinanden gentagne målinger. Hvis din temperatur er på mere end 38.5 blot en enkelt gang, skal du også kontakte afdelingen uanset tidspunkt. |
|  |  |  |  | 3, 4 or 5 | Kontakt venligst afdelingen. Husk at udfylde resten af skemaet, selvom du kontakter afdelingen. |

**Øvrige symptomer**

| **#ID** | **Question** | **Answer** | **Type** | **Conditions** |
| --- | --- | --- | --- | --- |
| 31 | Har du øvrige symptomer? | - Ja - Nej | Boolean |  |
| 32 | Angiv øvrigt symptom? |  | Free text | If qst 31 answer = 1 Ja |
| 33 | Inden for de seneste 7 dage, hvad var SVÆRHEDSGRADEN af FORGÅENDE SYMPTOM da det var VÆRST? | - Ingen - Mild - Moderat - Kraftig - Meget kraftig | Radio button | If qst 31 answer = 1 Ja |
| 34 | Angiv øvrigt symptom? |  | Free text | If qst 31 answer = 1 Ja |
| 35 | Inden for de seneste 7 dage, hvad var SVÆRHEDSGRADEN af FORGÅENDE SYMPTOM da det var VÆRST? | - Ingen - Mild - Moderat - Kraftig - Meget kraftig | Radio button | If qst 31 answer = 1 Ja |
| 36 | Angiv øvrigt symptom? |  | Free text | If qst 31 answer = 1 Ja |
| 37 | Inden for de seneste 7 dage, hvad var SVÆRHEDSGRADEN af FORGÅENDE SYMPTOM da det var VÆRST? | - Ingen - Mild - Moderat - Kraftig - Meget kraftig | Radio button | If qst 31 answer = 1 Ja |
| 38 | Angiv øvrigt symptom? |  | Free text | If qst 31 answer = 1 Ja |
| 39 | Inden for de seneste 7 dage, hvad var SVÆRHEDSGRADEN af FORGÅENDE SYMPTOM da det var VÆRST? | - Ingen - Mild - Moderat - Kraftig - Meget kraftig | Radio button | If qst 31 answer = 1 Ja |
| 40 | Angiv øvrigt symptom? |  | Free text | If qst 31 answer = 1 Ja |
| 41 | Inden for de seneste 7 dage, hvad var SVÆRHEDSGRADEN af FORGÅENDE SYMPTOM da det var VÆRST? | - Ingen - Mild - Moderat - Kraftig - Meget kraftig | Radio button | If qst 31 answer = 1 Ja |

| **Version** | **Dato** | **Kommentar** |
| --- | --- | --- |
| [**Nuværende version**](file:///C:\wiki\display\PD\viewpage.action%3fpageId=1021378922) **(v. 4)** | **okt. 05, 2020 10:18** | [**Sofie Nielsen**](file:///C:\wiki\people\557058:8c37a4e7-bb28-4641-8f54-7b04afe29294) |
| [v. 3](file:///C:\wiki\display\PD\viewpage.action%3fpageId=1057521757) | sep. 28, 2020 09:30 | [Sofie Nielsen](/wiki/people/557058:8c37a4e7-bb28-4641-8f54-7b04afe29294) |
| [v. 2](file:///C:\wiki\display\PD\viewpage.action%3fpageId=1035829271) | sep. 23, 2020 14:27 | [Sofie Nielsen](/wiki/people/557058:8c37a4e7-bb28-4641-8f54-7b04afe29294) |
| [v. 1](file:///C:\wiki\display\PD\viewpage.action%3fpageId=1021280666) | sep. 23, 2020 14:01 | [Sofie Nielsen](/wiki/people/557058:8c37a4e7-bb28-4641-8f54-7b04afe29294) |
